# Supplementary material for: Maize feedstocks with improved digestibility reduce the costs and environmental impacts of biomass pretreatment and saccharification
Source: Springer Nature journal article supplement (doi:10.1186/s13068-016-0479-0), 2016-03-15
Supplement: 13068_2016_479_MOESM1_ESM.pdf [file 13068_2016_479_MOESM1_ESM.pdf]

**Table S1. Inventory of chemical and energetic inputs and outputs for the pretreatment of maize biomass under four different scenarios.**

| Scenario | Inputs               |                                     |           |                     | Outputs                       |                                      |
|----------|----------------------|-------------------------------------|-----------|---------------------|-------------------------------|--------------------------------------|
|          | Biomass (kg)         | H <sub>2</sub> SO <sub>4</sub> (kg) | NaOH (kg) | Heat (kWh)          | Total Glucose Production (kg) | Na <sub>2</sub> SO <sub>4</sub> (kg) |
| I        | 10.5*10 <sup>3</sup> | 2164                                | 44.1      | 149*10 <sup>3</sup> | 3700                          | 3133                                 |
| II       | 10.5*10 <sup>3</sup> | 2164                                | 44.1      | 149*10 <sup>3</sup> | 3200                          | 3133                                 |
| III      | 10.5*10 <sup>3</sup> | 1082                                | 22.1      | 121*10 <sup>3</sup> | 2900                          | 1567                                 |
| IV       | 11.0*10 <sup>3</sup> | 2267                                | 46.2      | 156*10 <sup>3</sup> | 3700                          | 3283                                 |
