# Supplementary material for: Maize feedstocks with improved digestibility reduce the costs and environmental impacts of biomass pretreatment and saccharification
Source: Springer Nature journal article supplement (doi:10.1186/s13068-016-0479-0), 2016-03-15
Supplement: 13068_2016_479_MOESM2_ESM.pdf [file 13068_2016_479_MOESM2_ESM.pdf]

**Table S2. Near infrared reflectance spectroscopy calibration statistics for maize stover cell wall composition traits.**

| Trait            | Unit                         | $N^a$ | Mean  | Min.  | Max.  | $R^2$ | SEC  | SECV |
|------------------|------------------------------|-------|-------|-------|-------|-------|------|------|
| CW               | $\text{g Kg}^{-1} \text{DM}$ | 710   | 61.37 | 40.73 | 82.00 | 0.93  | 1.81 | 1.84 |
| ADF <sup>b</sup> | $\text{g Kg}^{-1} \text{DM}$ | 357   | 36.16 | 20.12 | 52.19 | 0.94  | 1.34 | 1.39 |
| Lig              | $\text{g Kg}^{-1} \text{DM}$ | 337   | 3.96  | 0.58  | 7.35  | 0.59  | 0.73 | 0.76 |
| pCa I            | $\text{g Kg}^{-1} \text{CW}$ | 1563  | 15.60 | 1.45  | 21.72 | 0.87  | 1.23 | 1.26 |
| pCa II           | $\text{g Kg}^{-1} \text{CW}$ | 1494  | 11.54 | 2.24  | 20.83 | 0.88  | 1.09 | 1.13 |
| FA I             | $\text{g Kg}^{-1} \text{CW}$ | 1561  | 5.55  | 3.01  | 8.08  | 0.64  | 0.51 | 0.52 |
| FA II            | $\text{g Kg}^{-1} \text{CW}$ | 1499  | 6.90  | 4.21  | 9.60  | 0.66  | 0.53 | 0.54 |
| Di-FA I          | $\text{g Kg}^{-1} \text{CW}$ | 516   | 0.15  | 0.03  | 0.27  | 0.66  | 0.02 | 0.03 |
| Di-FA II         | $\text{g Kg}^{-1} \text{CW}$ | 514   | 0.33  | 0.11  | 0.54  | 0.61  | 0.04 | 0.05 |
| H                | $\text{g Kg}^{-1} \text{CW}$ | 1048  | 1.43  | 0.00  | 3.10  | 0.74  | 0.28 | 0.30 |
| S                | $\text{g Kg}^{-1} \text{CW}$ | 1054  | 7.22  | 0.41  | 14.03 | 0.79  | 1.03 | 1.09 |
| G                | $\text{g Kg}^{-1} \text{CW}$ | 1051  | 6.38  | 1.30  | 11.46 | 0.60  | 1.07 | 1.11 |

<sup>a</sup>  $N$  is the number of samples analyzed for development of calibration equation;  $R^2$  is the coefficient of determination between laboratory analysis and NIRS prediction, SEC is the standard error of calibration and SECV is the standard error of cross-validation predictions.

<sup>b</sup> Acid detergent fiber
